# Supplementary material
Source: PubMed Central journal article supplement (PMC6697277)
Supplement: JGMED1801075.pdf [file JGMED1801075.pdf]

## Supplemental Material

**TABLE 1**

Reliability of STEEM Using Cronbach's Alpha (Former Table 1)

| <b>Cronbach's Alpha</b>                                  |                        |                          |                         |
|----------------------------------------------------------|------------------------|--------------------------|-------------------------|
|                                                          | <b>Al-Ain (n = 15)</b> | <b>Corniche (n = 16)</b> | <b>Overall (n = 31)</b> |
| <b>STEEM (Whole)</b>                                     | 0.655                  | 0.795                    | 0.844                   |
| <b>Domains</b>                                           |                        |                          |                         |
| <b>Trainer and training</b>                              | 0.569                  | 0.782                    | 0.826                   |
| <b>Learning opportunities</b>                            | 0.632                  | 0.120                    | 0.499                   |
| <b>Atmosphere in the operating theatre</b>               | 0.231                  | 0.626                    | 0.730                   |
| <b>Perceptions of supervision, workload, and support</b> | 0.481                  | 0.625                    | 0.542                   |

**TABLE 2**

Factor Analysis Component

| Component | Total Variance Explained |               |              |                   |               |              |                  |               |              |
|-----------|--------------------------|---------------|--------------|-------------------|---------------|--------------|------------------|---------------|--------------|
|           | Al-Ain (n = 15)          |               |              | Corniche (n = 16) |               |              | Overall (n = 31) |               |              |
|           | Eigen Values             | % of Variance | Cumulative % | Eigen Values      | % of Variance | Cumulative % | Eigen Values     | % of Variance | Cumulative % |
| <b>1</b>  | 9.37                     | 23.42         | 23.42        | 8.94              | 22.34         | 22.34        | 9.84             | 24.60         | 24.60        |
| <b>2</b>  | 7.01                     | 17.52         | 40.94        | 5.16              | 12.89         | 35.23        | 3.77             | 9.43          | 34.03        |
| <b>3</b>  | 5.54                     | 13.86         | 54.79        | 4.13              | 10.33         | 45.57        | 3.32             | 8.29          | 42.32        |
| <b>4</b>  | 4.09                     | 10.23         | 65.03        | 3.54              | 8.85          | 54.42        | 2.63             | 6.58          | 48.89        |
| <b>5</b>  | 3.12                     | 7.81          | 72.83        | 3.36              | 8.39          | 62.81        | 2.52             | 6.30          | 55.19        |
| <b>6</b>  | 2.82                     | 7.05          | 79.88        | 2.85              | 7.13          | 69.94        | 2.16             | 5.40          | 60.59        |
| <b>7</b>  | 2.16                     | 5.39          | 85.28        | 2.31              | 5.78          | 75.72        | 2.00             | 5.00          | 65.59        |
| <b>8</b>  | 1.94                     | 4.86          | 90.14        | 2.12              | 5.29          | 81.01        | 1.65             | 4.12          | 69.71        |
| <b>9</b>  | 1.60                     | 4.00          | 94.14        | 1.59              | 3.98          | 84.99        | 1.61             | 4.02          | 73.73        |
| <b>10</b> |                          |               |              | 1.45              | 3.62          | 88.61        | 1.46             | 3.65          | 77.37        |
| <b>11</b> |                          |               |              | 1.12              | 2.80          | 91.41        | 1.28             | 3.19          | 80.57        |
| <b>12</b> |                          |               |              | 1.10              | 2.76          | 94.16        | 1.07             | 2.66          | 83.23        |

Al Ramsi E, Gami N. Evaluation of operating room learning environment for UAE obstetrics and gynecology residents using STEEM. *J Grad Med Educ.* 2019;11(4 suppl):100–103.

**TABLE 3**

Descriptive Statistics of Each Item

| Questions                                                                                          | Mean        | Median      | SD         | Minimum     | Maximum     | Percentiles |             |
|----------------------------------------------------------------------------------------------------|-------------|-------------|------------|-------------|-------------|-------------|-------------|
|                                                                                                    |             |             |            |             |             | 25          | 75          |
| 1. My trainer has a pleasant personality                                                           | 4.0         | 4.0         | 0.6        | 3.0         | 5.0         | 4.0         | 4.0         |
| 2. I get on well with my trainer                                                                   | 4.0         | 4.0         | 0.6        | 2.0         | 5.0         | 4.0         | 4.0         |
| 3. My trainer is enthusiastic about teaching                                                       | 3.6         | 4.0         | 0.8        | 2.0         | 5.0         | 3.0         | 4.0         |
| 4. My trainer has a genuine interest in my progress                                                | 3.4         | 4.0         | 1.0        | 2.0         | 5.0         | 3.0         | 4.0         |
| 5. I understand what my trainer is trying to teach me                                              | 3.9         | 4.0         | 0.7        | 2.0         | 5.0         | 4.0         | 4.0         |
| 6. My trainer's surgical skills are very good                                                      | 4.0         | 4.0         | 0.8        | 2.0         | 5.0         | 4.0         | 4.0         |
| 7. My trainer gives me time to practice surgical skills in theatre                                 | 3.7         | .0          | 0.8        | 2.0         | 5.0         | 3.0         | 4.0         |
| 8. My trainer immediately takes the instruments away when I do not perform well                    | 2.6         | 2.0         | 1.1        | 1.0         | 5.0         | 2.0         | 4.0         |
| 9. Before the operation my trainer discusses the surgical technique used                           | 3.5         | 4.0         | 1.0        | 1.0         | 5.0         | 3.0         | 4.0         |
| 10. Before the operation my trainer discusses what part of the procedure I will perform            | 3.8         | 4.0         | 0.9        | 2.0         | 5.0         | 4.0         | 4.0         |
| 11. My trainer expects my surgical skills to be as good as theirs                                  | 2.8         | 3.0         | 0.9        | 1.0         | 4.0         | 2.0         | 4.0         |
| 12. My trainer gives me feedback on my performance                                                 | 4.0         | 4.0         | 0.6        | 2.0         | 5.0         | 4.0         | 4.0         |
| 13. My trainer's criticism is constructive                                                         | 3.4         | 4.0         | 0.9        | 1.0         | 5.0         | 3.0         | 4.0         |
| <b>SUM</b>                                                                                         | <b>46.7</b> | <b>48.0</b> | <b>6.3</b> | <b>32.0</b> | <b>59.0</b> | <b>41.0</b> | <b>52.0</b> |
| 14. On this unit the type of operations performed are too complex for my level                     | 3.2         | 3.0         | 1.0        | 1.0         | 5.0         | 2.0         | 4.0         |
| 15. The elective operating list has the right case mix to suit my training                         | 3.5         | 4.0         | 1.0        | 1.0         | 5.0         | 3.0         | 4.0         |
| 16. There are far too many cases on the elective list to give me the opportunity to operate        | 3.0         | 3.0         | 1.1        | 1.0         | 5.0         | 2.0         | 4.0         |
| 17. I get enough opportunity to assist                                                             | 4.3         | 4.0         | 0.5        | 4.0         | 5.0         | 4.0         | 5.0         |
| 18. There are enough theatre sessions per week for me to gain the appropriate experience           | 3.1         | 3.0         | 1.1        | 1.0         | 5.0         | 2.0         | 4.0         |
| 19. More senior trainees take my opportunities to operate                                          | 2.7         | 2.0         | 1.0        | 1.0         | 4.0         | 2.0         | 4.0         |
| 20. The number of emergency procedures is sufficient for me to gain the right operative experience | 2.8         | 3.0         | 1.1        | 1.0         | 4.0         | 2.0         | 4.0         |
| 21. The variety of emergency cases gives me the appropriate exposure                               | 3.6         | 4.0         | 0.8        | 1.0         | 5.0         | 3.0         | 4.0         |

Al Ramsi E, Gami N. Evaluation of operating room learning environment for UAE obstetrics and gynecology residents using STEEM. *J Grad Med Educ.* 2019;11(4 suppl):100–103.

|                                                                                               |             |             |            |             |             |             |             |
|-----------------------------------------------------------------------------------------------|-------------|-------------|------------|-------------|-------------|-------------|-------------|
| 22. My trainer is in too much of a rush during emergency cases to let me operate              | 2.0         | 2.0         | 0.9        | 1.0         | 4.0         | 1.0         | 2.0         |
| 23. I miss out on operative experience because of restrictions on working hours               | 3.0         | 4.0         | 1.0        | 1.0         | 5.0         | 3.0         | 4.0         |
| 24. I have the opportunity to develop the skills required at my stage                         | 3.2         | 4.0         | 1.0        | 1.0         | 5.0         | 2.0         | 4.0         |
| <b>SUM</b>                                                                                    | <b>35.1</b> | <b>34.0</b> | <b>4.3</b> | <b>28.0</b> | <b>44.0</b> | <b>32.0</b> | <b>39.0</b> |
| 25. The atmosphere in theatre is pleasant                                                     | 3.9         | 4.0         | 0.9        | 1.0         | 5.0         | 4.0         | 4.0         |
| 26. In theatre I don't like being corrected in front of other students, nurses, and residents | 3.5         | 4.0         | 1.1        | 1.0         | 5.0         | 2.0         | 4.0         |
| 27. The nursing staff dislike it when I operate as the operation takes longer                 | 3.1         | 3.0         | 1.2        | 1.0         | 5.0         | 2.0         | 4.0         |
| 28. The anesthetists put pressure on my trainer to operate himself to reduce unaesthetic time | 2.9         | 3.0         | 1.3        | 1.0         | 5.0         | 2.0         | 4.0         |
| 29. The theatre staff are friendly                                                            | 4.1         | 4.0         | 0.8        | 2.0         | 5.0         | 4.0         | 5.0         |
| 30. I feel discriminated against in theatre because of my sex                                 | 4.2         | 4.0         | 0.8        | 1.0         | 5.0         | 4.0         | 5.0         |
| 31. I feel discriminated against in theatre because of my ethnicity                           | 4.1         | 4.0         | 0.7        | 2.0         | 5.0         | 4.0         | 5.0         |
| 32. I feel part of a team in theatre                                                          | 4.0         | 4.0         | 0.7        | 2.0         | 5.0         | 4.0         | 4.0         |
| <b>SUM</b>                                                                                    | <b>29.7</b> | <b>30.0</b> | <b>4.5</b> | <b>18.0</b> | <b>37.0</b> | <b>27.0</b> | <b>34.0</b> |
| 33. I am too busy doing other work to go to theatre                                           | 3.4         | 4.0         | 0.9        | 1.0         | 5.0         | 3.0         | 4.0         |
| 34. I am often too tired to get the most out of theatre teaching                              | 3.8         | 4.0         | 0.9        | 2.0         | 5.0         | 3.0         | 4.0         |
| 35. I am so stressed in theatre that I do not learn as much as I could                        | 4.0         | 4.0         | 0.6        | 2.0         | 5.0         | 4.0         | 4.0         |
| 36. I am asked to perform operations alone that I do not feel competent at                    | 4.1         | 4.0         | 0.8        | 1.0         | 5.0         | 4.0         | 5.0         |
| 37. When I am in theatre, there is nobody to cover the ward                                   | 3.9         | 4.0         | 1.0        | 1.0         | 5.0         | 4.0         | 5.0         |
| 38. I get called for other work during operations                                             | 3.6         | 4.0         | 1.0        | 1.0         | 5.0         | 3.0         | 4.0         |
| 39. The level of supervision in theatre is adequate for my level                              | 4.0         | 4.0         | 0.7        | 2.0         | 5.0         | 4.0         | 4.0         |
| 40. Theatre sessions are too long                                                             | 3.7         | 4.0         | 1.0        | 1.0         | 5.0         | 3.0         | 4.0         |
| <b>SUM</b>                                                                                    | <b>30.6</b> | <b>31.0</b> | <b>3.4</b> | <b>24.0</b> | <b>38.0</b> | <b>28.0</b> | <b>33.0</b> |

Note: The highest, lowest, and totals of subsections have been highlighted.

Al Ramsi E, Gami N. Evaluation of operating room learning environment for UAE obstetrics and gynecology residents using STEEM. *J Grad Med Educ.* 2019;11(4 suppl):100–103.

**TABLE 4**

Comparison of Overall STEEM and of Each Domain Between the 2 Hospitals (Parametric Test for Testing of Mean Value)

| Domain                                            | Al-Ain<br>(n = 13)<br>(Mean ± SD) | Corniche<br>(n = 18)<br>(Mean ± SD) | Difference<br>(Mean ± SD) | 95% CI of the Difference |       | t-value | P Value  |
|---------------------------------------------------|-----------------------------------|-------------------------------------|---------------------------|--------------------------|-------|---------|----------|
|                                                   |                                   |                                     |                           | Lower                    | Upper |         |          |
| Trainer and training                              | 51.2 ± 4.0                        | 43.4 ± 5.6                          | 7.8 ± 1.8                 | 7.1                      | 11.5  | 4.297   | < .0001* |
| Learning opportunities                            | 37.0 ± 4.9                        | 33.7 ± 3.4                          | 3.3 ± 1.5                 | 0.3                      | 6.4   | 2.246   | .032*    |
| Atmosphere in the operating theatre               | 33.2 ± 2.3                        | 27.2 ± 4.0                          | 6.0 ± 1.2                 | 3.5                      | 8.5   | 4.825   | < .0001* |
| Perceptions of supervision, workload, and support | 30.7 ± 3.7                        | 30.5 ± 3.3                          | 0.2 ± 1.3                 | -2.5                     | 2.7   | 0.107   | .915     |
| Total Score                                       | 152.1 ± 9.1                       | 134.9 ± 11.8                        | 17.2 ± 3.9                | 9.2                      | 25.3  | 4.406   | < .0001* |

Al Ramsi E, Gami N. Evaluation of operating room learning environment for UAE obstetrics and gynecology residents using STEEM. *J Grad Med Educ.* 2019;11(4 suppl):100–103.

**TABLE 5**

Comparison of our study with that of Casser<sup>12</sup> and Al-Qahtani<sup>16</sup>

| <b>Domain</b>                                     | <b>Overall</b> | <b>Corniche</b> | <b>Al-Ain</b> | <b>Casser</b> | <b>Al-Qahtani</b> |
|---------------------------------------------------|----------------|-----------------|---------------|---------------|-------------------|
| Trainer and training                              | 71.8%          | 66.76%          | 78.7%         | 78.9%         | 52%               |
| Learning opportunities                            | 63.8%          | 61.2%           | 67.2%         | 67.5%         | 57%               |
| Atmosphere in the operating theatre               | 74.25%         | 68%             | 83%           | 76%           | 55%               |
| Perceptions of supervision, workload, and support | 76.5%          | 76.5%           | 76.75%        | 75%           | 57%               |

Al Ramsi E, Gami N. Evaluation of operating room learning environment for UAE obstetrics and gynecology residents using STEEM. *J Grad Med Educ.* 2019;11(4 suppl):100–103.

### Supplemental Material

#### Certification of Consent

*Please tick the appropriate boxes*

##### Taking Part

Yes

I have read and understood the project information sheet.

I have been given the opportunity to ask questions about the project.

I agree to take part in the project.

I understand that my taking part is voluntary; I can withdraw from the study at any time and I do not have to give any reasons for why I no longer want to take part.

I understand that my words may be quoted in publications, reports, web pages, and other research outputs however they will be anonymous.

---

Name of participant [printed]

---

Signature

---

Date

For any inquiry please contact:

Dr. Ebtehal Alramsi  
[eramsi@seha.ae](mailto:eramsi@seha.ae)  
0508046040  
Corniche Hospital

Dr. Neha Gami  
[nehagami@hotmail.com](mailto:nehagami@hotmail.com)  
0566624350  
Specialist, Obstetrics and Gynecology  
Healthplus clinic, Abudhabi
